# Supplementary material
Source: PubMed Central journal article supplement (PMC6716603)
Supplement: NIHMS1536860-supplement-Supplement1.pdf [file NIHMS1536860-supplement-Supplement1.pdf]

## Supplementary Appendix

This appendix has been provided by the authors to give readers additional information about their work.

Supplement to: Motzer RJ, Penkov K, Haanen J, et al. Avelumab plus axitinib versus sunitinib for advanced renal-cell carcinoma. *N Engl J Med* 2019;380:1103-15. DOI: [10.1056/NEJMoa1816047](https://doi.org/10.1056/NEJMoa1816047)

## Supplementary Appendix

This appendix has been provided by the authors to give the readers additional information about their work. Supplement to: Motzer RJ, Penkov K, Haanen J, et al. Avelumab Plus Axitinib Versus Sunitinib for Advanced Renal-Cell Carcinoma

### Table of Contents

|                                                                                                                                                                                                                               |    |
|-------------------------------------------------------------------------------------------------------------------------------------------------------------------------------------------------------------------------------|----|
| <b>JAVELIN Renal 101 Investigators</b> .....                                                                                                                                                                                  | 2  |
| <b>Definitions of Selected Terms and Endpoints</b> .....                                                                                                                                                                      | 3  |
| <b>Sensitivity Analyses</b> .....                                                                                                                                                                                             | 5  |
| <b>Figure S1. Gatekeeping Testing Strategy</b> .....                                                                                                                                                                          | 6  |
| <b>Figure S2. CONSORT Diagram</b> .....                                                                                                                                                                                       | 7  |
| <b>Figure S3. Kaplan-Meier Plot of Overall Survival in the Overall Population</b> .....                                                                                                                                       | 9  |
| <b>Figure S4. Plot of Schoenfeld Residuals from Stratified Cox Proportional Regression Model for Progression-Free Survival in the PD-L1–Positive group</b> .....                                                              | 10 |
| <b>Figure S5. Plot of Schoenfeld Residuals from Stratified Cox Proportional Regression Model for Progression-Free Survival in the Overall Population</b> .....                                                                | 11 |
| <b>Figure S6. Time to and Duration of Response to Avelumab Plus Axitinib in the PD-L1–Positive group (N = 149)</b> .....                                                                                                      | 12 |
| <b>Figure S7. Subgroup Analysis of Prognostic Factors for Progression-Free Survival in the Overall Population</b> .....                                                                                                       | 13 |
| <b>Figure S8. Subgroup Analysis of Prognostic Factors for Objective Response in the PD-L1–Positive Group</b> .....                                                                                                            | 14 |
| <b>Figure S9. Subgroup Analysis of Prognostic Factors for Objective Response in the Overall Population</b> .....                                                                                                              | 15 |
| <b>Figure S10. Best Percentage Change in Target Lesions in the Overall Population</b> .....                                                                                                                                   | 16 |
| <b>Figure S11. Kaplan-Meier Plot of Progression-Free Survival Based on Investigator Assessment in the PD-L1–Positive Group (A) and the Overall Population (B)</b> .....                                                       | 17 |
| <b>Table S1. P-values for Interactions of Treatment per Subgroup</b> .....                                                                                                                                                    | 18 |
| <b>Table S2. Investigator-Assessed Antitumor Activity in the PD-L1–Positive Group and the Overall Population</b> .....                                                                                                        | 19 |
| <b>Table S3. Treatment-Related Adverse Events of Any Grade Occurring in <math>\geq 10\%</math> or Grade <math>\geq 3</math> Events Occurring in <math>\geq 5\%</math> of Treated Patients in the Overall Population</b> ..... | 20 |
| <b>Table S4. Subsequent Anticancer Therapies in the Overall Population</b> .....                                                                                                                                              | 21 |

## **JAVELIN Renal 101 Investigators**

**The following investigators participated in the JAVELIN Renal 101 trial:** **Australia:** KE Cuff, ID Davis, KT Feeney, D Goldstein, HP Gurney, G Kannourakis, DW Pook, SC Troon. **Austria:** M Schmidinger, UM Vogl. **Belgium:** P Debruyne, C Gennigens, J-P Machiels, S Rottey. **Canada:** NS Basappa, GA Bjarnason, JF Castilloux, SL Ellard, DYC Heng, CK Kollmannsberger, WH Miller, KR Potvin, PG Zalewski. **Denmark:** PF Geertsen, NV Jensen. **France:** L Albiges, L Geoffrois, G Gravis-Mescam, FML Joly-Lobbedez, B Laguerre, S Negrier, F Rolland, E Voog. **Germany:** J Bedke, M-O Grimm. **Hungary:** G Bodoky, L Geczi. **Israel:** D Keizman, R Leibowitz-Amit, V Neiman, A Peer, DL Sarid, A Sella. **Italy:** A Bearz, F Nole, A Santoro, CN Sternberg, E Verzoni. **Japan:** M Eto, S Fukasawa, S Hatakeyama, H Kanayama, T Kato, K Kondo, H Miyake, K Numakura, W Obara, M Oya, N Sassa, N Shinohara, T Takagi, Y Tomita, H Uemura, M Uemura. **Mexico:** MA Alvarez Avitia, CA Hernandez Hernandez, YA Lopez Chuken. **Netherlands:** MJB Aarts, MW Dercksen, JBAG Haanen, A-P Hamberg, I Houtenbos, AJM Van den Eertwegh. **New Zealand:** J Edwards, J Fernando, C Jacobs, RT North, ABT Tan. **Romania:** TE Ciuleanu, FC Militaru, MP Schenker, DE Sirbu. **Russian Federation:** BY Alekseev, AV Alyasova, NV Kislov, ID Lifirenko, A Nosov, KD Penkov, AG Vasiliev. **South Korea:** K Bhumsuk, JS Chung, JG Kim, SH Kim, HJ Lee, J-L Lee, SH Park, SY Rha. **Spain:** P Gajate Borau, JL Perez Gracia, B Perez Valderrama. **Sweden:** U Stierner. **United Kingdom:** KM Fife, JMG Larkin, PD Nathan, PM Patel, TB Powles, B Venugopal, TS Waddell. **United States:** NS Balzer Haas, MA Bilien, M Campbell, MA Carducci, DC Cho, TK Choueiri, PW Cobb, TS Collins, TM Cosgriff, GK Doshi, Y Faroun, RA Figlin, MN Fishman, TE Hutson, ET Lam, M Markus, RD McCroskey, MW Meshad, JP Monk, RJ Motzer, RK Pachynski, LC Pagliaro, SK Pal, GK Philips, DI Quinn, WK Rathmell, BI Rini, DR Shaffer, I Tafur, CA Thomas, SS Tykodi, NJ Vogelzang, Y Zhang.

## Definitions of Selected Terms and Endpoints

Eastern Cooperative Oncology Group performance status was scored and defined as follows:

| Score | Definition                                                                                                                                                 |
|-------|------------------------------------------------------------------------------------------------------------------------------------------------------------|
| 0     | Fully active, able to carry on all pre-disease activities without restriction                                                                              |
| 1     | Restricted in physically strenuous activity but ambulatory and able to carry out work of a light or sedentary nature (eg, light house work or office work) |
| 2     | Ambulatory and capable of all self-care, but unable to carry out any work activities; up and about more than 50% of waking hours                           |
| 3     | Capable of only limited self-care; confined to bed or chair more than 50% of waking hours                                                                  |
| 4     | Completely disabled; cannot carry on any self-care; totally confined to bed or chair                                                                       |
| 5     | Dead                                                                                                                                                       |

International Metastatic Renal Cell Carcinoma Database Consortium prognostic risk score (favorable [score of 0], intermediate [score of 1 or 2], or poor [score of 3 to 6]) was determined according to the number of the following risk factors present: a Karnofsky performance status score of 70, less than 1 year from time of initial diagnosis, a hemoglobin level below the lower limit of the normal range, a corrected serum calcium concentration of more than 10 mg per deciliter (2.5 mmol per liter), an absolute neutrophil count above the upper limit of the normal range, and a platelet count above the upper limit of the normal range.

Memorial Sloan Kettering Cancer Center prognostic risk score (favorable [score of 0], intermediate [score of 1 or 2], or poor [score of  $\geq 3$ ]) was determined according to the number of the following risk factors present: Karnofsky performance status score  $< 80$ , less than 1 year from time of initial diagnosis to start of therapy, a hemoglobin level below the lower limit of the normal range, lactate dehydrogenase level more than 1.5 times above the upper limit of normal, and a corrected serum calcium concentration of more than 10 mg per deciliter (2.5 mmol per liter).

Progression-free survival was defined as the time from randomization to the first documentation of objective disease progression or death due to any cause, whichever occurred first.

Overall survival was defined as the time from randomization to death due to any cause.

The objective response rate was defined as the percentage of patients with a confirmed best response of complete response or partial response according to RECIST, version 1.1.

Duration of response was defined as the time from the first documentation of objective response to progression or death.

## **Sensitivity Analyses**

Sensitivity analyses were performed to explore the robustness of the primary analysis results for PFS; these results were similar to those of the primary analysis methodology. The model assumption of proportional hazards was assessed and an analysis of restricted mean survival time was also performed. The model assumption of proportional hazards was assessed based on the Schoenfeld's residual test and by plotting  $\log(-\log(\text{PFS}))$  versus  $\log(\text{time})$  within each randomization stratum. The results suggested that there was no evidence the proportional hazards assumption was violated and the model used to assess the treatment effect of avelumab in combination with axitinib compared to sunitinib on PFS was valid (Figures S4 and S5 in the Supplementary Appendix). Although the proportional hazards assumption does not appear to be violated, an analysis based on the restricted mean survival time for PFS was performed and the results were consistent with those based on the log-rank test ( $P < 0.001$ ) comparing the combination arm with the sunitinib arm using a truncation point equal to the minimum of the longest follow-up time of either arm, in both the PD-L1-positive group and the overall population.

Figure S1. Gatekeeping Testing Strategy.

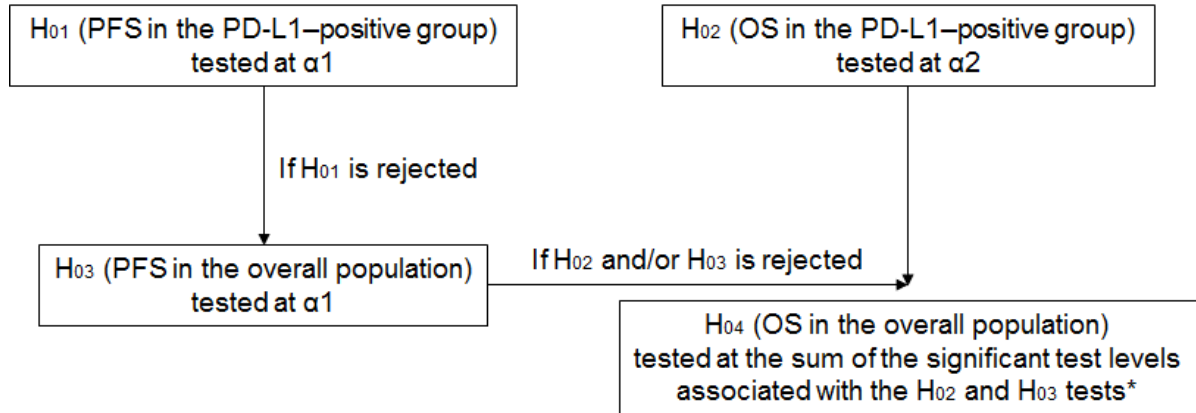

\*  $\alpha$  level for  $H_{04}$  will be  
=  $\alpha_1 + \alpha_2$  if both  $H_{02}$  and  $H_{03}$  are rejected  
=  $\alpha_2$  if  $H_{02}$  is rejected and  $H_{03}$  is not rejected  
=  $\alpha_1$  if  $H_{02}$  is not rejected and  $H_{03}$  is rejected

**Figure S2. CONSORT Diagram.**

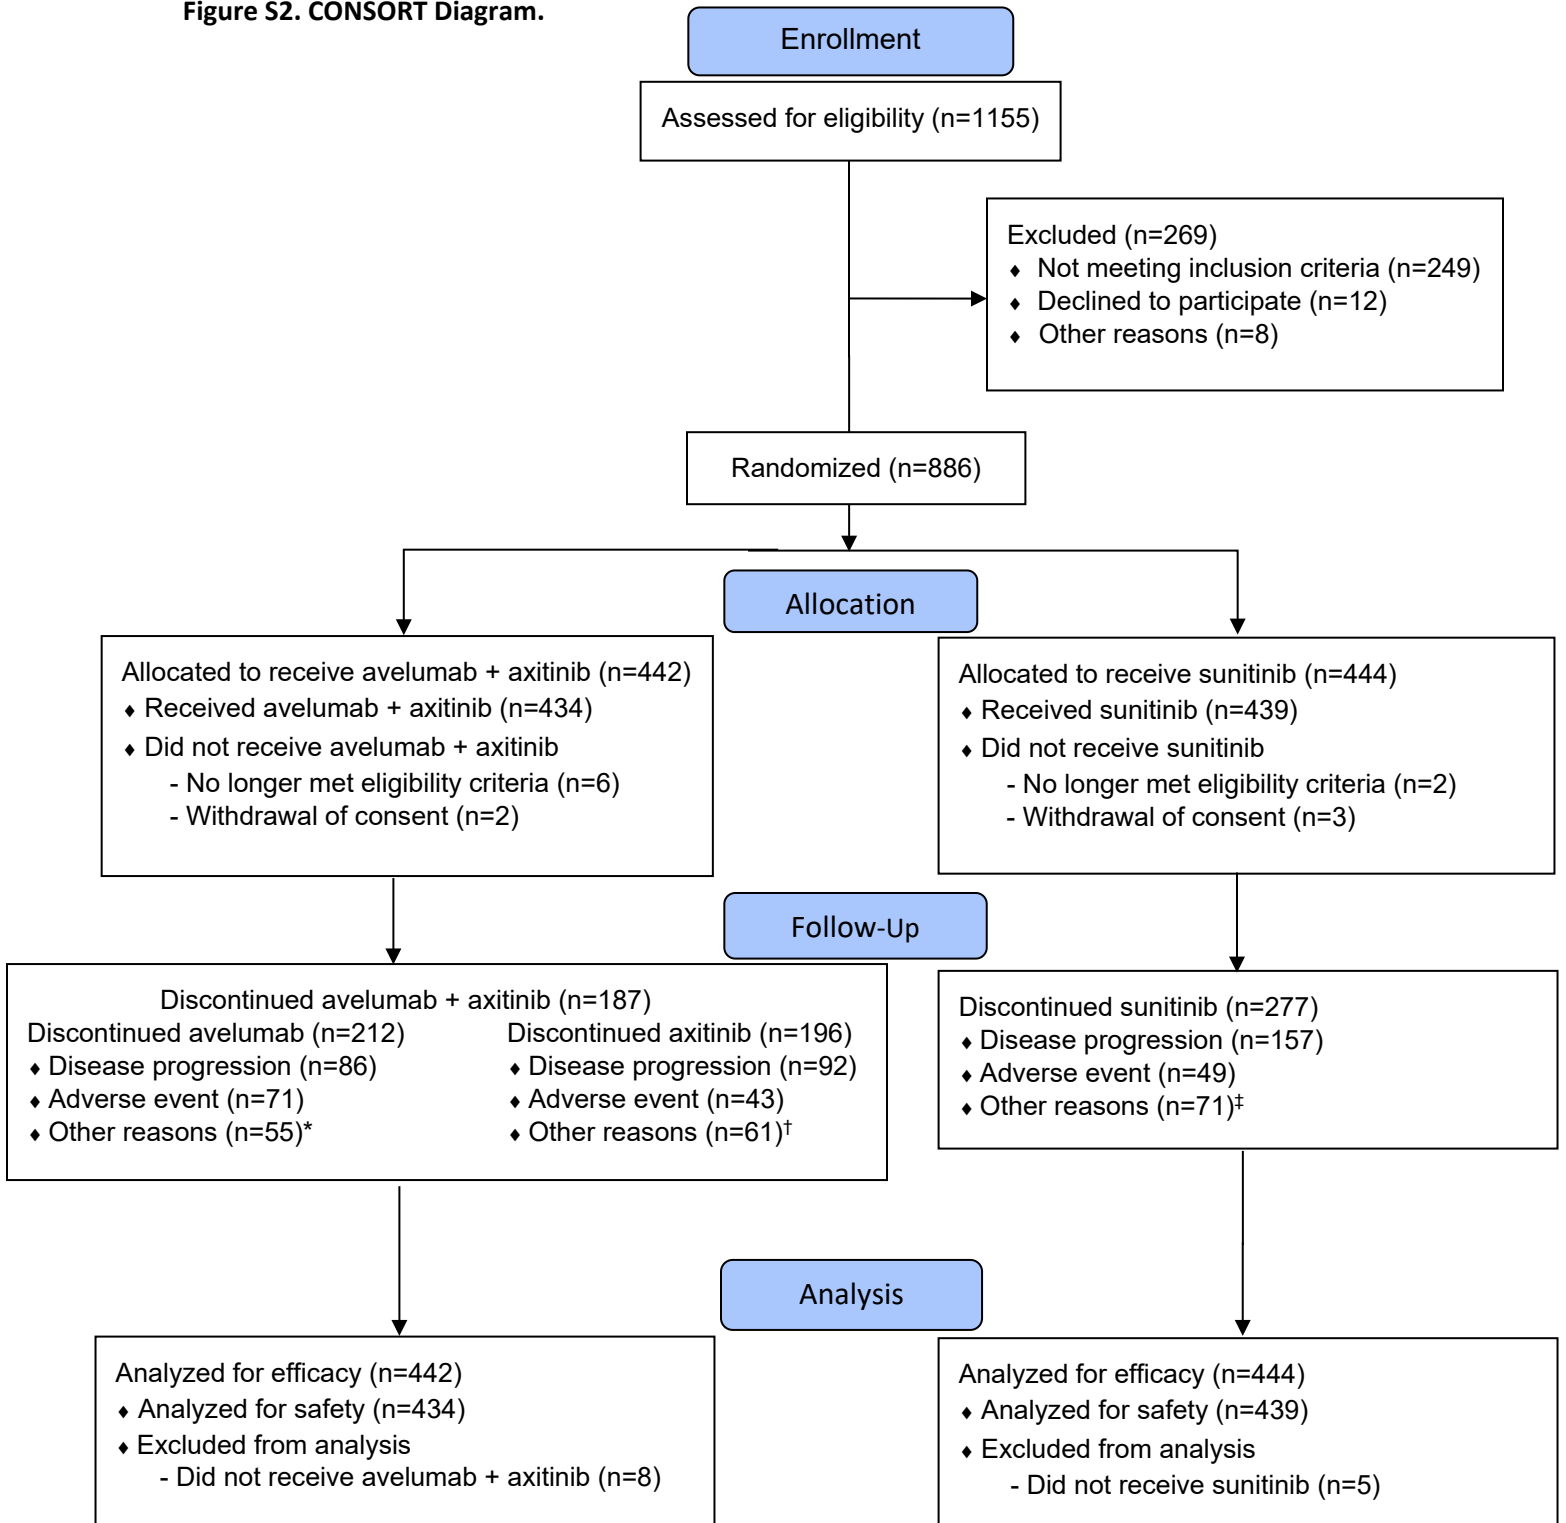



\* Reasons included global deterioration of health status (n=15), withdrawal of consent (n=12), and death (n=12).

† Reasons included global deterioration of health status (n=19), withdrawal of consent (n=14), death (n=13).

‡ Reasons included withdrawal of consent (n=25), global deterioration of health status (n=16), and death (n=14).

Figure S3. Kaplan-Meier Plot of Overall Survival in the Overall Population.

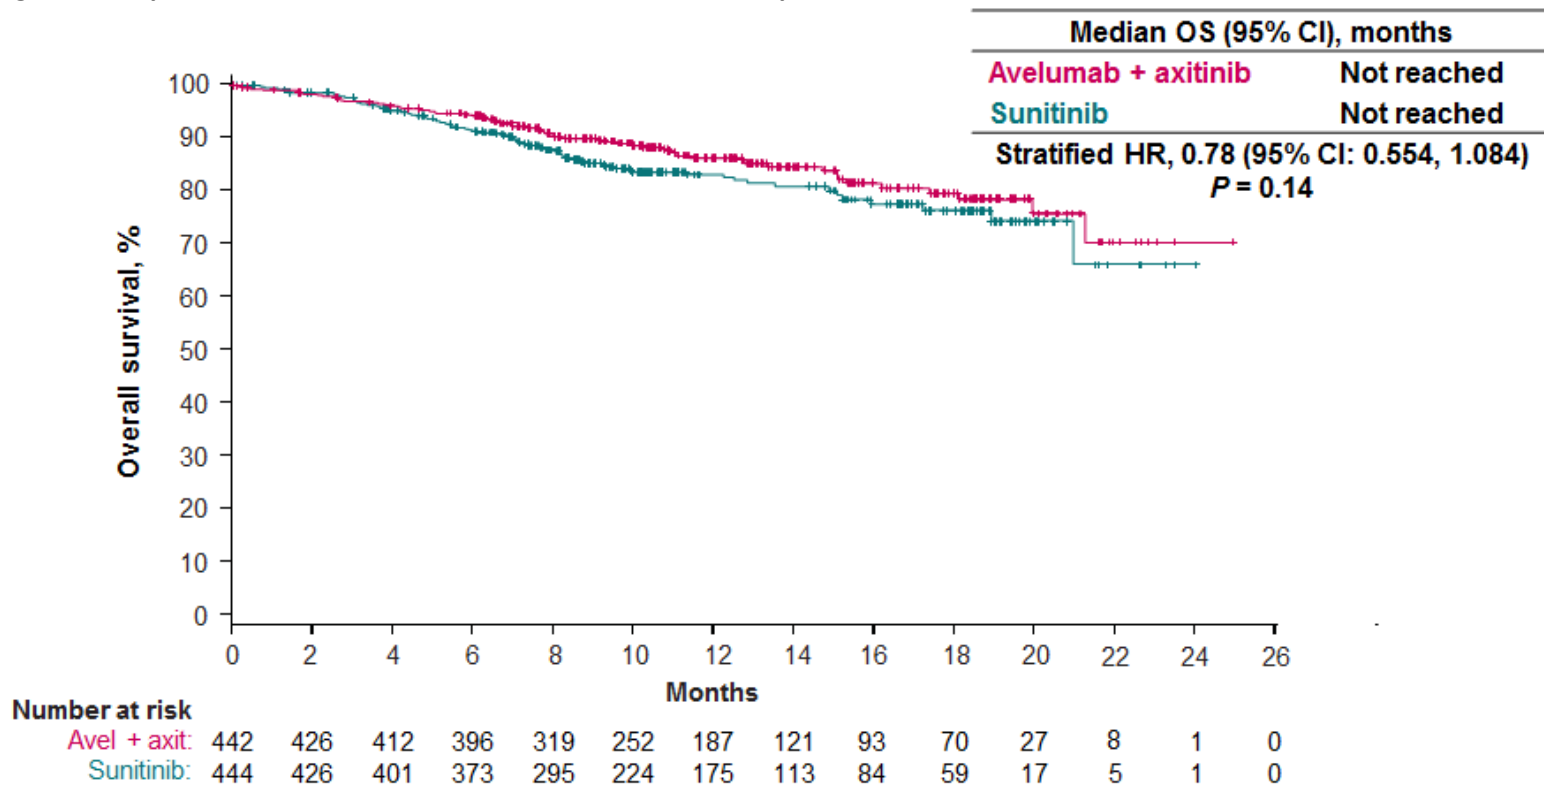

Figure S4. Plot of Schoenfeld Residuals from Stratified Cox Proportional Regression Model for Progression-Free Survival in the PD-L1-Positive group.

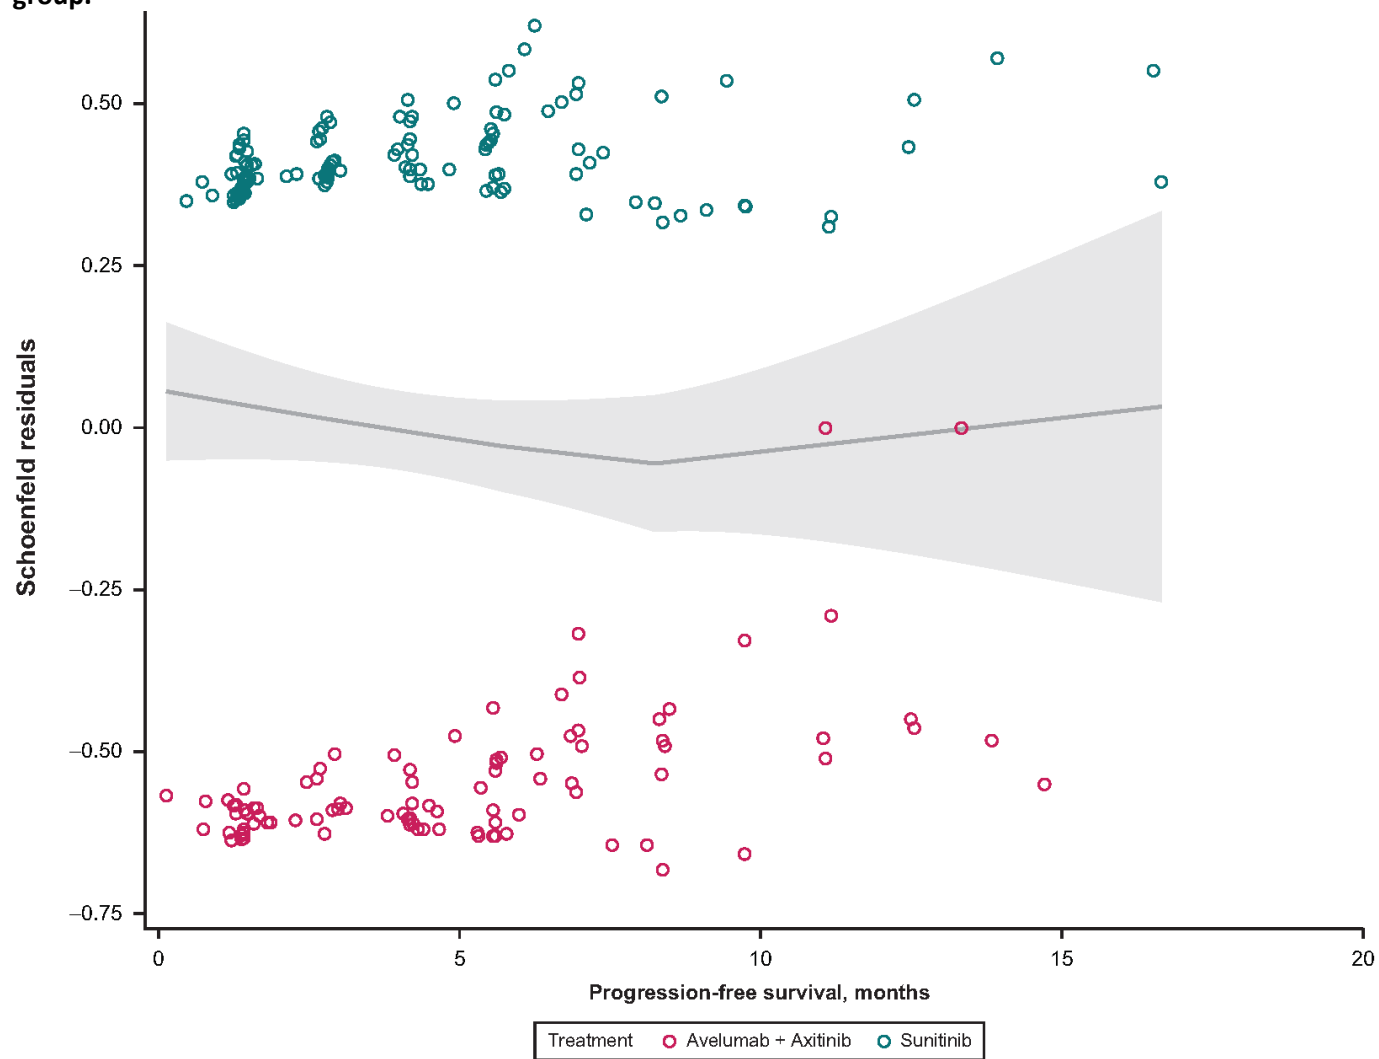

Figure S5. Plot of Schoenfeld Residuals from Stratified Cox Proportional Regression Model for Progression-Free Survival in the Overall Population.

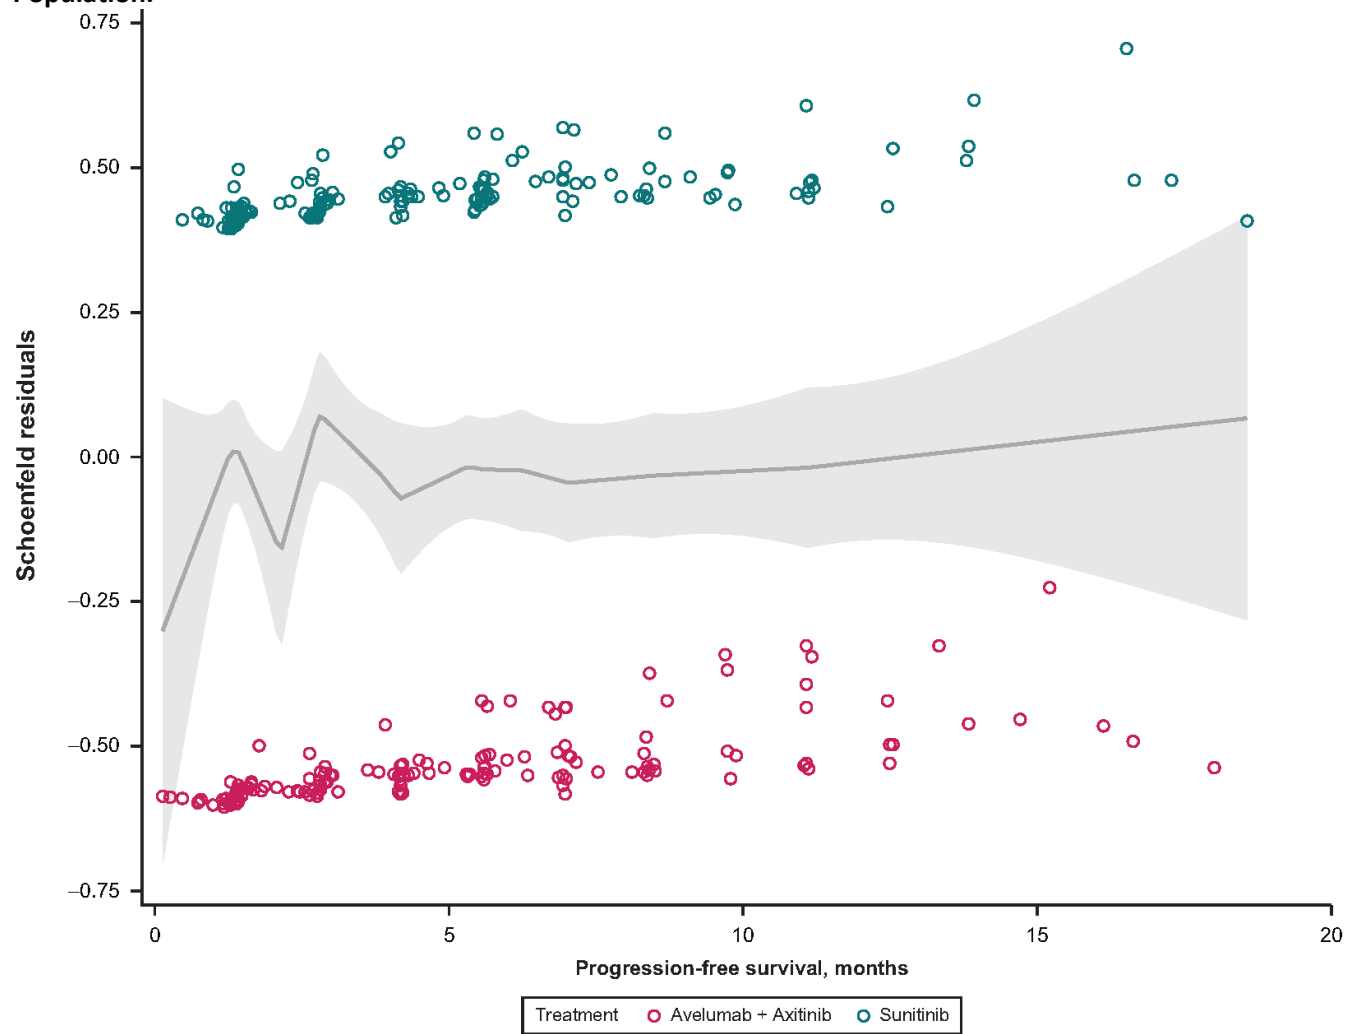

Figure S6. Time to and Duration of Response to Avelumab Plus Axitinib in the PD-L1-Positive group (N = 149).

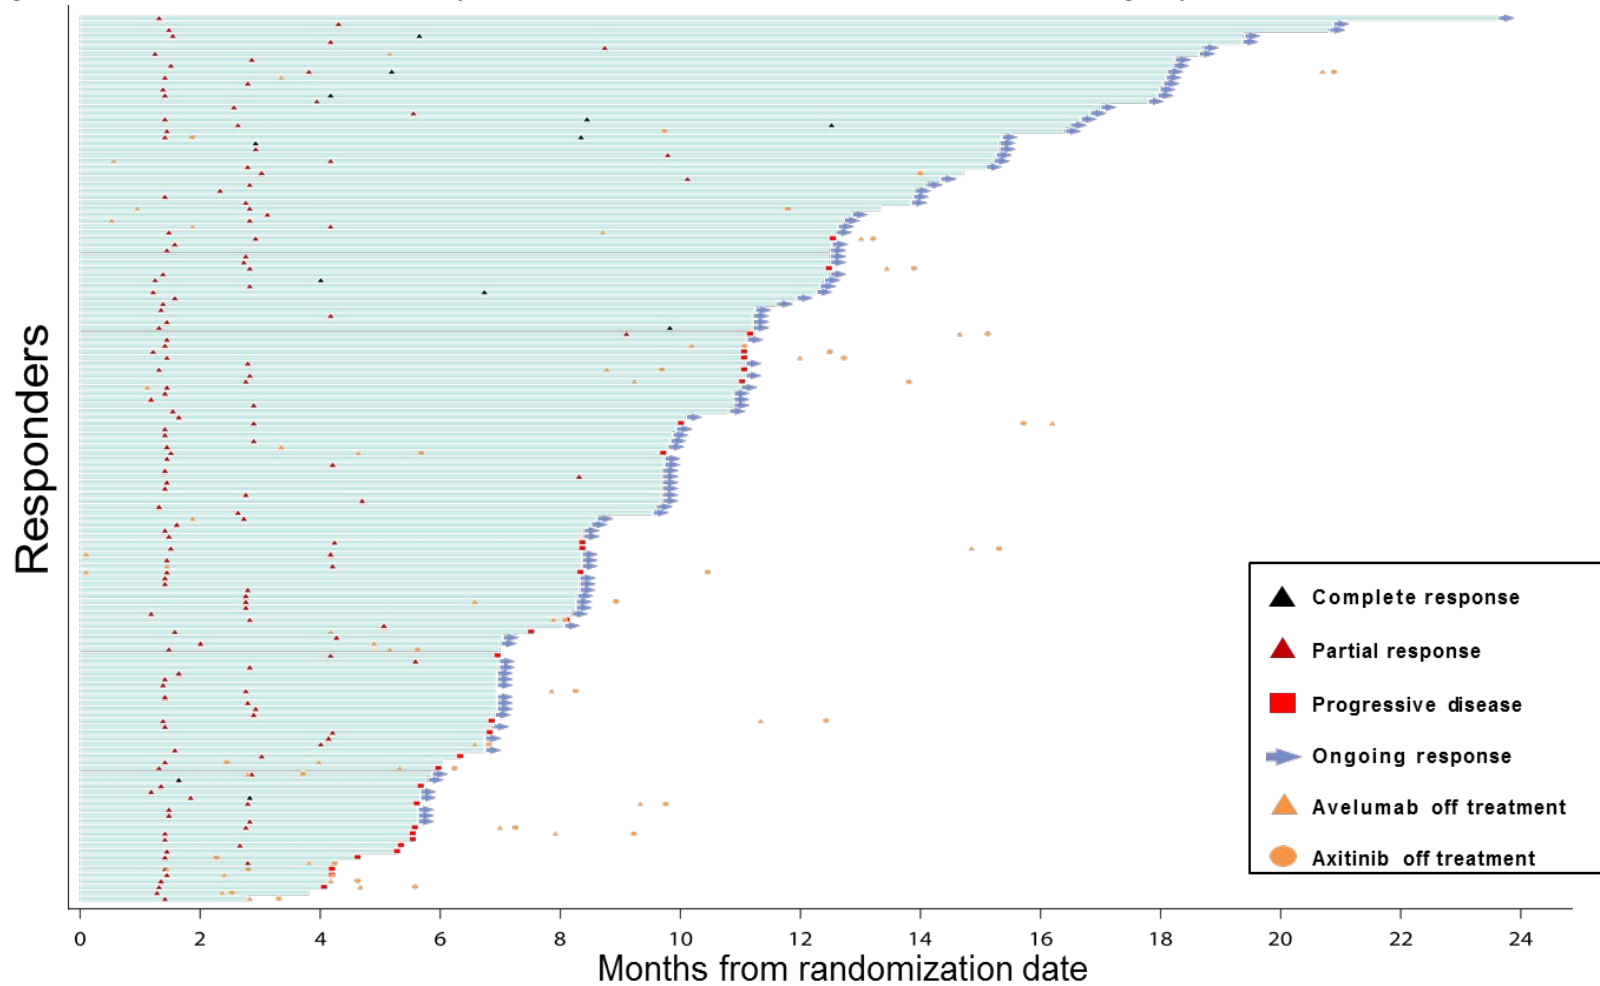





**Figure S9. Subgroup Analysis of Prognostic Factors for Objective Response in the Overall Population.**

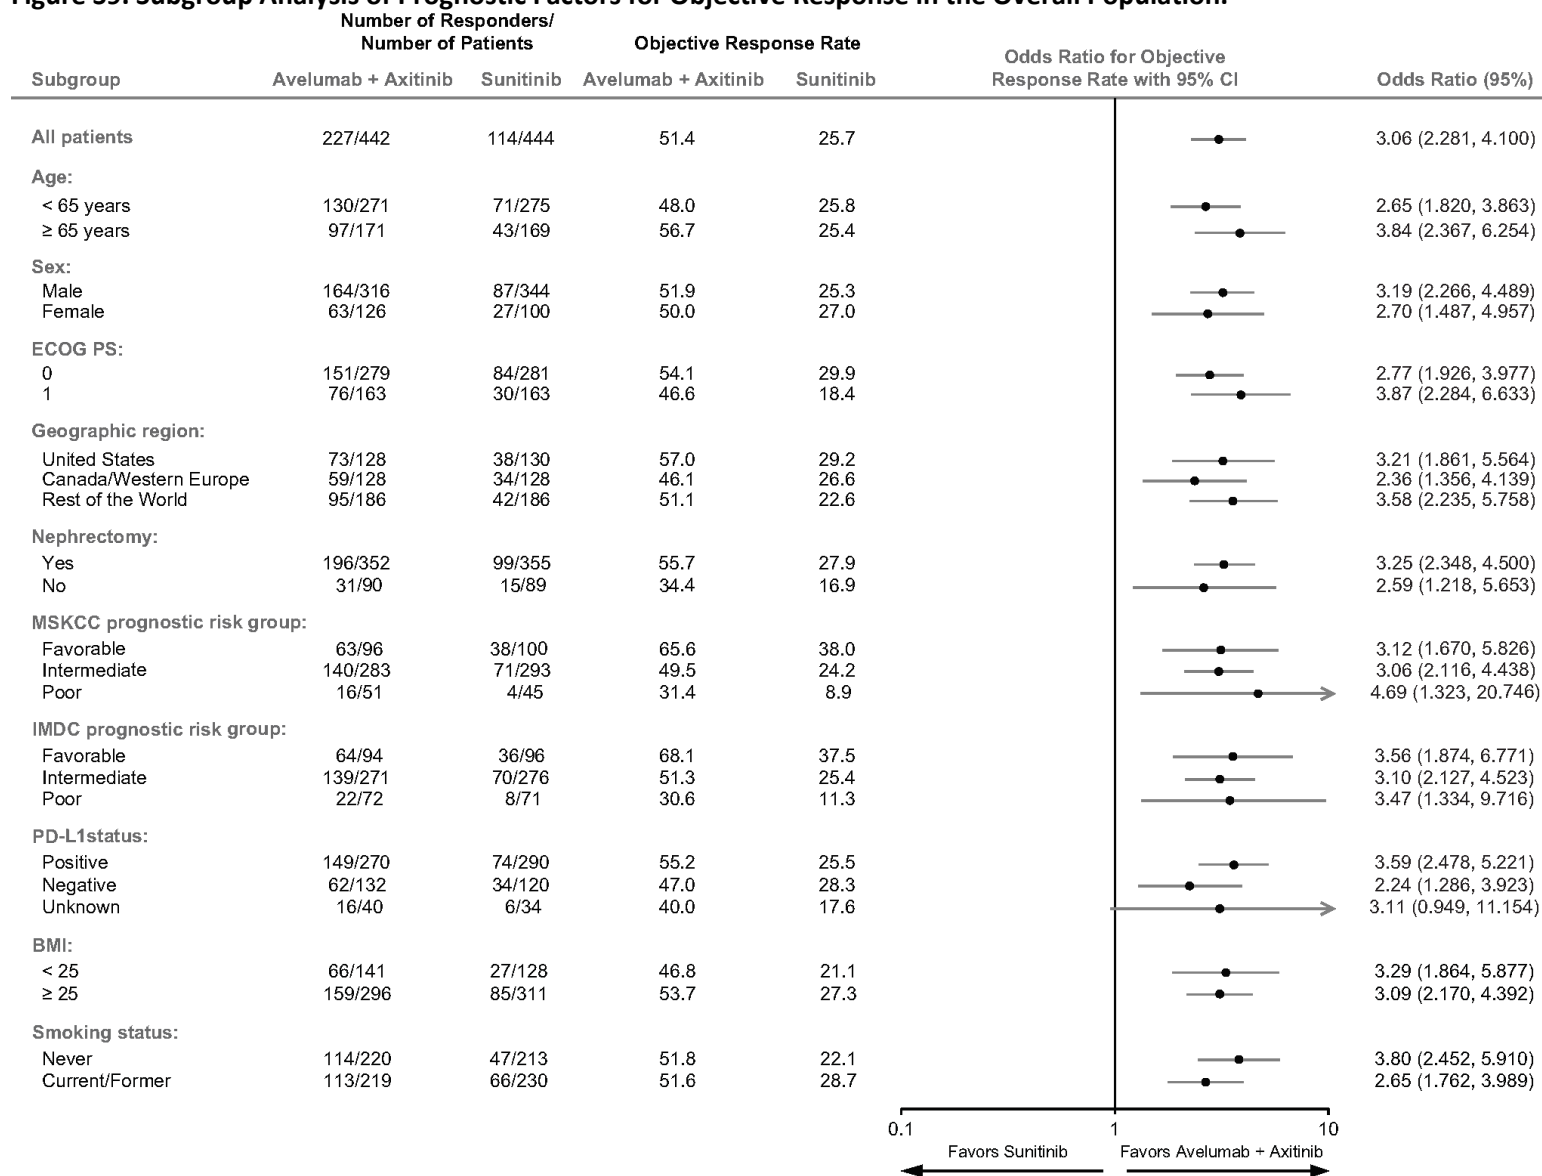



Figure S10. Best Percentage Change in Target Lesions in the Overall Population.

■ Progressive disease    ■ Stable disease    ■ Partial response    ■ Complete response    ■ Not evaluable

**Avelumab + axitinib (N = 412)**

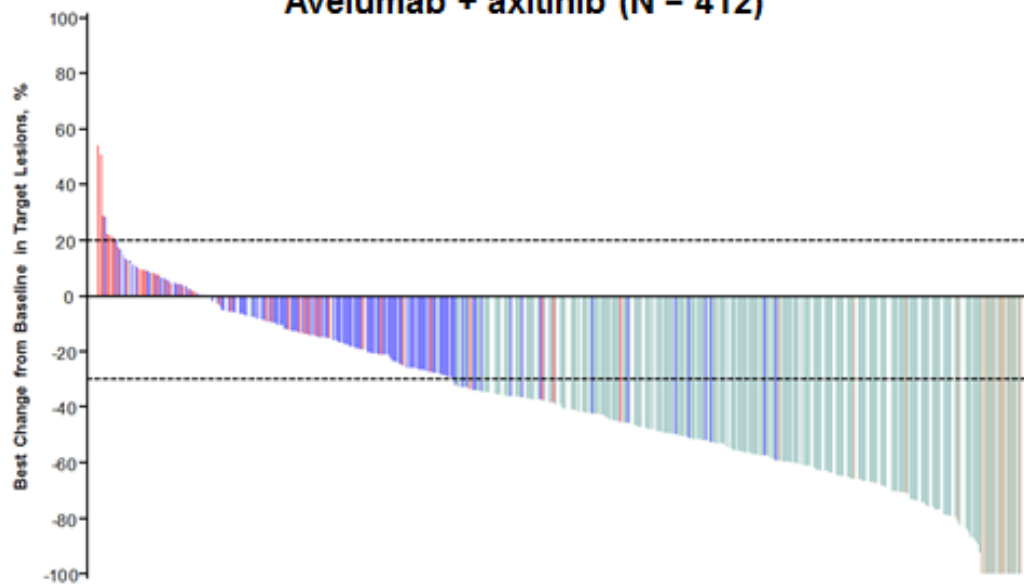

**Sunitinib (N = 408)**

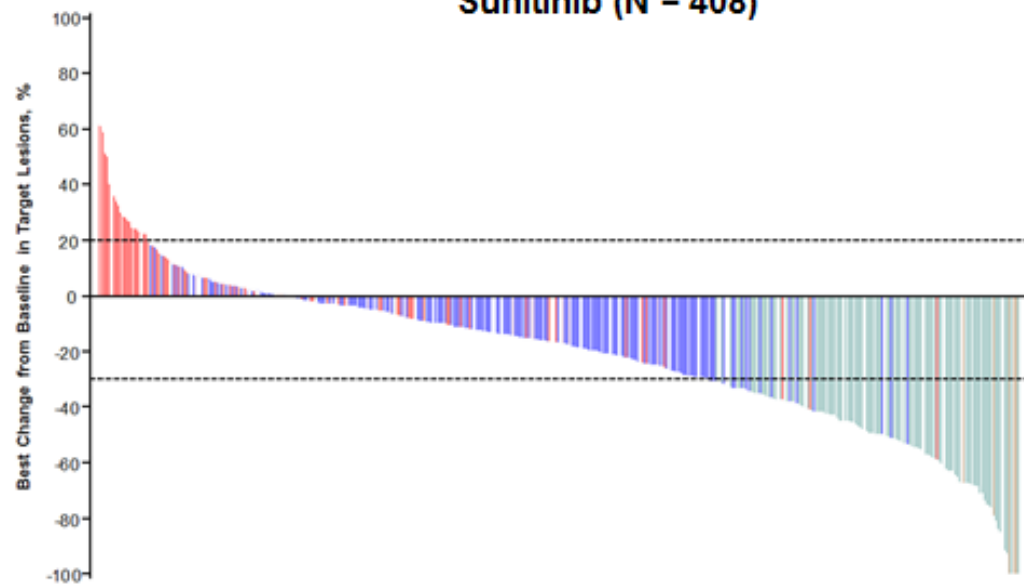

Figure S11. Kaplan-Meier Plot of Progression-Free Survival Based on Investigator Assessment in the PD-L1-Positive Group (A) and the Overall Population (B).

A

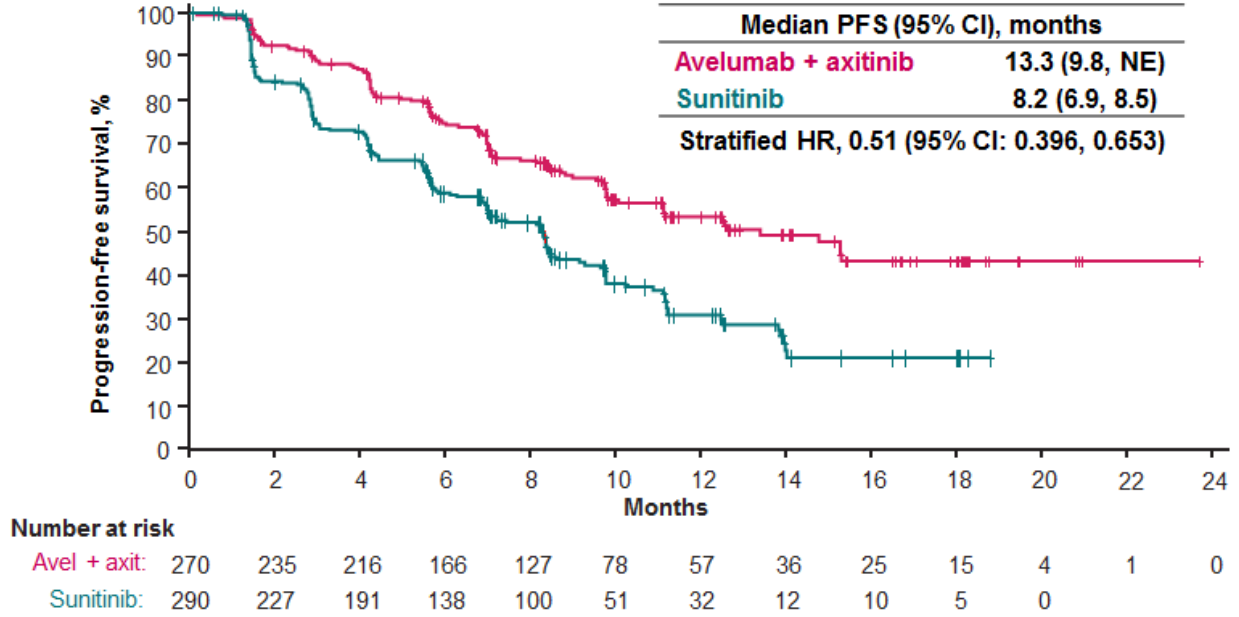

B

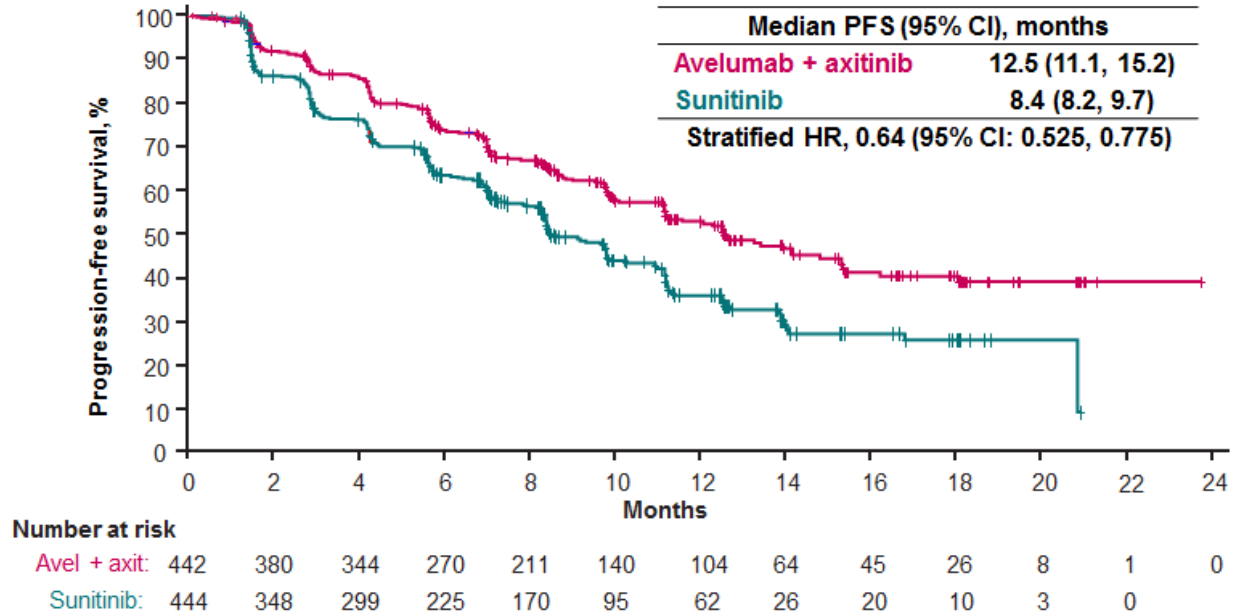

NE, not estimable.

**Table S1. P-values for Interactions of Treatment per Subgroup.**

| Covariate                   | PD-L1–Positive Group                   | Overall Population |
|-----------------------------|----------------------------------------|--------------------|
|                             | P-value for Interaction <sup>*,†</sup> |                    |
| Age                         | 0.483                                  | 0.874              |
| Sex                         | 0.129                                  | 0.168              |
| Geographic region           | 0.192                                  | 0.792              |
| ECOG PS                     | 0.452                                  | 0.823              |
| Prior nephrectomy           | 0.950                                  | 0.607              |
| MSKCC prognostic risk group | 0.739                                  | 0.292              |
| IMDC prognostic risk group  | 0.758                                  | 0.503              |
| PD-L1 status                | –                                      | 0.411              |

\* P-value for the interaction is based on the likelihood ratio test. The p-value is 2-sided.

† Interaction p-values for treatment by BMI and smoking status are not included because these are ad hoc exploratory subgroups.

**Table S2. Investigator-Assessed Antitumor Activity in the PD-L1–Positive Group and the Overall Population.**

| Characteristic                                    | PD-L1–Positive Group                |                        | Overall Population                  |                        |
|---------------------------------------------------|-------------------------------------|------------------------|-------------------------------------|------------------------|
|                                                   | Avelumab Plus Axitinib<br>(N = 270) | Sunitinib<br>(N = 290) | Avelumab Plus Axitinib<br>(N = 442) | Sunitinib<br>(N = 444) |
| Confirmed objective response rate (95% CI), %     | 61.9 (55.8, 67.7)                   | 29.7 (24.5, 35.3)      | 55.9 (51.1, 60.6)                   | 30.2 (25.9, 34.7)      |
| Stratified odds ratio (95% CI)                    | 3.98 (2.721, 5.710)                 |                        | 2.99 (2.230, 3.970)                 |                        |
| Confirmed best overall response, no. (%)          |                                     |                        |                                     |                        |
| Complete response                                 | 11 (4.1)                            | 9 (3.1)                | 14 (3.2)                            | 10 (2.3)               |
| Partial response                                  | 156 (57.8)                          | 77 (26.6)              | 233 (52.7)                          | 124 (27.9)             |
| Stable disease                                    | 66 (24.4)                           | 128 (44.1)             | 127 (28.7)                          | 202 (45.5)             |
| Progressive disease                               | 20 (7.4)                            | 51 (17.6)              | 38 (8.6)                            | 68 (15.3)              |
| Not evaluable                                     | 16 (5.9)*                           | 24 (8.3)†              | 29 (6.6)‡                           | 39 (8.8)§              |
| Other <sup>  </sup>                               | 1 (0.4)                             | 1 (0.3)                | 1 (0.2)                             | 1 (0.2)                |
| Median time to response (range), months           | 2.6 (1.1, 13.8)                     | 2.8 (1.2, 12.5)        | 2.8 (1.1, 15.0)                     | 2.8 (1.2, 12.5)        |
| Median duration of response (95% CI), months      | NR (11.9, NE)                       | 8.8 (7.0, NE)          | NR (11.9, NE)                       | 12.6 (8.3, 15.3)       |
| Patients with ongoing response, no./total no. (%) | 112/167 (67.1)                      | 49/86 (57.0)           | 164/247 (66.4)                      | 82/134 (61.2)          |

NE, not estimable; NR, not reached.

\* No postbaseline assessments due to early death or other reasons such as withdrawal of consent or start of new anti-cancer therapy (n = 10); stable disease <6 weeks after randomization (n = 4); all postbaseline assessments have overall response of not evaluable (n = 2).

† Stable disease <6 weeks after randomization (n = 11); no postbaseline assessments due to early death or other reasons such as withdrawal of consent or start of new anti-cancer therapy (n = 9); new anticancer therapy started before first postbaseline assessment (n = 2); progressive disease >12 weeks after randomization (n = 2).

‡ No postbaseline assessments due to early death or other reasons such as withdrawal of consent or start of new anti-cancer therapy (n = 18); stable disease <6 weeks after randomization (n = 7); no adequate baseline assessment (n = 2); all postbaseline assessments have overall response of not evaluable (n = 2).

§ Stable disease <6 weeks after randomization (n = 19); no postbaseline assessments due to early death or other reasons such as withdrawal of consent or start of new anti-cancer therapy (n = 13); new anticancer therapy started before first postbaseline assessment (n = 3); no adequate baseline assessment (n = 2); progressive disease >12 weeks after randomization (n = 2).

<sup>||</sup> Patients without target lesions at baseline per independent review who achieved non–complete response/non–progressive disease.

**Table S3. Treatment-Related Adverse Events of Any Grade Occurring in ≥10% or Grade ≥3 Events Occurring in ≥5% of Treated Patients in the Overall Population.**

| Preferred Term                             | All Treated Patients (N = 873)      |            |                        |            |
|--------------------------------------------|-------------------------------------|------------|------------------------|------------|
|                                            | Avelumab Plus Axitinib<br>(N = 434) |            | Sunitinib<br>(N = 439) |            |
|                                            | All Grades                          | Grade ≥3   | All Grades             | Grade ≥3   |
|                                            | no. (%)                             |            |                        |            |
| Patients with events                       | 414 (95.4)                          | 246 (56.7) | 423 (96.4)             | 243 (55.4) |
| Diarrhea                                   | 235 (54.1)                          | 22 (5.1)   | 196 (44.6)             | 11 (2.5)   |
| Hypertension                               | 208 (47.9)                          | 106 (24.4) | 142 (32.3)             | 67 (15.3)  |
| Fatigue                                    | 156 (35.9)                          | 13 (3.0)   | 159 (36.2)             | 16 (3.6)   |
| Palmar-plantar erythrodysesthesia syndrome | 144 (33.2)                          | 25 (5.8)   | 148 (33.7)             | 19 (4.3)   |
| Dysphonia                                  | 116 (26.7)                          | 2 (0.5)    | 12 (2.7)               | 0          |
| Nausea                                     | 107 (24.7)                          | 3 (0.7)    | 148 (33.7)             | 5 (1.1)    |
| Hypothyroidism                             | 105 (24.2)                          | 1 (0.2)    | 59 (13.4)              | 1 (0.2)    |
| Stomatitis                                 | 96 (22.1)                           | 8 (1.8)    | 100 (22.8)             | 4 (0.9)    |
| Decreased appetite                         | 86 (19.8)                           | 7 (1.6)    | 115 (26.2)             | 4 (0.9)    |
| Chills                                     | 62 (14.3)                           | 1 (0.2)    | 16 (3.6)               | 0          |
| Mucosal inflammation                       | 58 (13.4)                           | 5 (1.2)    | 60 (13.7)              | 4 (0.9)    |
| Alanine aminotransferase increased         | 57 (13.1)                           | 21 (4.8)   | 43 (9.8)               | 9 (2.1)    |
| Dysgeusia                                  | 56 (12.9)                           | 0          | 141 (32.1)             | 0          |
| Rash                                       | 54 (12.4)                           | 2 (0.5)    | 42 (9.6)               | 2 (0.5)    |
| Dyspnea                                    | 53 (12.2)                           | 6 (1.4)    | 24 (5.5)               | 1(0.2)     |
| Pruritus                                   | 53 (12.2)                           | 0          | 19 (4.3)               | 0          |
| Arthralgia                                 | 52 (12.0)                           | 1 (0.2)    | 24 (5.5)               | 0          |
| Infusion-related reaction                  | 52 (12.0)                           | 7 (1.6)    | 0                      | 0          |
| Aspartate aminotransferase increased       | 49 (11.3)                           | 12 (2.8)   | 48 (10.9)              | 6 (1.4)    |
| Weight decreased                           | 49 (11.3)                           | 7 (1.6)    | 17 (3.9)               | 1 (0.2)    |
| Vomiting                                   | 42 (9.7)                            | 1 (0.2)    | 68 (15.5)              | 7 (1.6)    |
| Asthenia                                   | 41 (9.4)                            | 5 (1.2)    | 54 (12.3)              | 8 (1.8)    |
| Dyspepsia                                  | 24 (5.5)                            | 0          | 74 (16.9)              | 0          |
| Thrombocytopenia                           | 12 (2.8)                            | 1 (0.2)    | 78 (17.8)              | 24 (5.5)   |
| Anemia                                     | 9 (2.1)                             | 1 (0.2)    | 73 (16.6)              | 22 (5.0)   |
| Neutropenia                                | 6 (1.4)                             | 1 (0.2)    | 79 (18.0)              | 34 (7.7)   |

**Table S4. Subsequent Anticancer Therapies in the Overall Population.**

| Preferred Term                                            | Overall Population                     |                        |
|-----------------------------------------------------------|----------------------------------------|------------------------|
|                                                           | Avelumab Plus<br>Axitinib<br>(N = 442) | Sunitinib<br>(N = 444) |
| Patients with any follow-up anticancer treatment, no. (%) | 92 (20.8)                              | 174 (39.2)             |
| Cabozantinib                                              | 42 (9.5)                               | 28 (6.3)               |
| Everolimus                                                | 19 (4.3)                               | 19 (4.3)               |
| Axitinib                                                  | 15 (3.4)                               | 17 (3.8)               |
| Sunitinib                                                 | 15 (3.4)                               | 23 (5.2)               |
| Nivolumab                                                 | 14 (3.2)                               | 107 (24.1)             |
| Lenvatinib                                                | 11 (2.5)                               | 16 (3.6)               |
| Pazopanib                                                 | 7 (1.6)                                | 12 (2.7)               |
| Bevacizumab                                               | 3 (0.7)                                | 1 (0.2)                |
| Ipilimumab                                                | 3 (0.7)                                | 7 (1.6)                |
| Investigational drug                                      | 2 (0.5)                                | 23 (5.2)               |
| Blinded therapy                                           | 1 (0.2)                                | 0                      |
| Drug, unspecified                                         | 1 (0.2)                                | 0                      |
| Tivozanib                                                 | 1 (0.2)                                | 1 (0.2)                |
| Atezolizumab                                              | 0                                      | 2 (0.5)                |
| Durvalumab                                                | 0                                      | 6 (1.4)                |
| Gemcitabine                                               | 0                                      | 2 (0.5)                |
| Gimeracil/Oteracil/Tegafur                                | 0                                      | 1 (0.2)                |
| Ibrutinib                                                 | 0                                      | 1 (0.2)                |
| Interferon                                                | 0                                      | 1 (0.2)                |
| Pembrolizumab                                             | 0                                      | 1 (0.2)                |
| Sorafenib                                                 | 0                                      | 2 (0.5)                |
| X4P-001                                                   | 0                                      | 1 (0.2)                |
